1 **TITLE: Lack of Evidence that Ursodeoxycholic Acid's Effects on the Gut Microbiome**  
2 **Influence Colorectal Adenoma Risk**

3 Short title: UDCA alters the gut microbiome.

4

5 Talima Pearson<sup>1,2,\*</sup>, J. Gregory Caporaso<sup>1,2,\*</sup>, Monica Yellowhair<sup>3</sup>, Nicholas A. Bokulich<sup>1</sup>, Denise  
6 J. Roe<sup>3</sup>, Betsy C. Wertheim<sup>3</sup>, Mark Linhart<sup>1</sup>, Jessica A. Martinez<sup>3,4</sup>, Cherae Bilagody<sup>1</sup>, Heidie  
7 Hornstra<sup>1</sup>, David S. Alberts<sup>3</sup>, Peter Lance<sup>3,\*\*</sup>, Patricia A. Thompson<sup>3,5,\*\*</sup>,

8 1. Pathogen and Microbiome Institute, Northern Arizona University, Flagstaff, AZ, USA.

9 2. Department of Biological Sciences, Northern Arizona University, Flagstaff, AZ, USA.

10 3. University of Arizona Cancer Center, University of Arizona, Tucson, AZ, USA.

11 4. Department of Nutritional Sciences, University of Arizona, Tucson, AZ, USA.

12 5. Stony Brook School of Medicine, Stony Brook, NY, USA

13 \* Authors share first authorship.

14 \*\* Authors share senior authorship

15

16 **Grant support:** This project was funded by the Partnership for Native American Cancer  
17 Prevention (NIH/NCI U54CA143924 and U54CA143925). The microbiome bioinformatics work  
18 was supported in part by NSF Award 1565100 to JGC. The fecal archive for this study was  
19 supported in part by R01 CA151708 (to PAT and PL). Research in this manuscript was directly  
20 supported by the Biostatistics and Tissue Acquisition and Cellular/Molecular Analysis Shared  
21 Resources Funded by the NCI Award P30CA023074.

22

23 **Abbreviations:** UDCA: Ursodeoxycholic acid; CRC: Colorectal cancer; DSS: Dextran sodium  
24 sulfate; AOM: Azoxymethane; PBC: Primary biliary cirrhosis; OTU: Operational taxonomic unit;  
25 ASV: amplicon sequence variant.

26

27 **Correspondence:**

28 J, Gregory Caporaso, PhD, Pathogen and Microbiome Institute, Flagstaff, AZ, 86011. Email:

29 [greg.caporaso@nau.edu](mailto:greg.caporaso@nau.edu), tel: 928-523-5845, fax; 928-523-0639

30 Peter Lance, MD, University of Arizona Cancer Center, 1515 N. Campbell Avenue, Tucson, AZ,  
31 85724. E-mail: [plance@uacc.arizona.edu](mailto:plance@uacc.arizona.edu), tel: 520-626-4492; fax: 520-626-5348.

32 Patricia A. Thompson, PhD, Stony Brook School of Medicine, Stony Brook, NY, 11794. Email:

33 [Patricia.Thompson-Carino@stonybrookmedicine.edu](mailto:Patricia.Thompson-Carino@stonybrookmedicine.edu), tel: (631) 444-3000, fax; (631) 444-3424

34

35 **Disclosures:** The authors declare no conflicts of interest.

36

37 **Author contributions:** Conception, funding, and design: TP, JGC, DSA, PL, PAT. Data  
38 generation: MY, CB, HH. Analysis/interpretation: TP, JGC, NAB, DJR, BCW, JAM, DSA, PL,  
39 PAT.

40

41 **Data access:** Raw sequence data is currently being deposited in the Qiita microbiome meta-  
42 analysis repository, and the ENA sequence read archive. Accession numbers will be included in  
43 the final version of this manuscript, after they have been generated. For review purposes, data  
44 can be anonymously accessed through dropbox using the following link:

45 <https://www.dropbox.com/sh/49115v1mukwjtc3/AABdB8hx33ogeheILLmvom9na?dl=0>

46 **Word count:** 3855

47

48

49

## 50 **ABSTRACT**

51 **Objective.** We previously reported that Ursodeoxycholic acid (UDCA), a therapeutic bile acid,  
52 reduces risk for advanced colorectal adenoma in men but not women. Interactions between the  
53 gut microbiome and fecal bile acid composition as a factor in colon cancer neoplasia have been  
54 postulated but evidence is limited to small cohorts and animal studies.

55  
56 **Design.** Using banked stool samples collected as part of a phase III randomized clinical trial of  
57 UDCA for the prevention of colorectal neoplasia, we compared change in the microbiome  
58 composition after 3 years intervention in a subset of participants randomized to 8–10 mg/kg of  
59 body weight UDCA (n=198) to placebo (n=203). UDCA effects on the microbiome, sex and  
60 adenoma outcome were investigated.

61  
62 **Results.** Study participants randomized to UDCA experienced compositional changes in their  
63 microbiome that were statistically more similar to other individuals in the UDCA arm than to  
64 those in the placebo arm. This change reflected an UDCA-associated shift in microbial  
65 community distance metrics ( $P < 0.001$ ), independent of sex, with no evidence of UDCA effect  
66 on microbial richness ( $P > 0.05$ ). These UDCA-associated shifts in microbial community  
67 distance metrics from baseline to end-of-study were not associated with risk of any or advanced  
68 adenoma (all  $P > 0.05$ ) in men or women.

69  
70 **Conclusion.** Despite a large sampling of randomized clinical trial participants, daily UDCA use  
71 only modestly influenced the relative abundance of microbial species in stool with no evidence  
72 for effects of UDCA on stool microbial community composition as a modifier of colorectal  
73 adenoma risk.

74  
75 **Keywords.** Ursodeoxycholic acid; gut microbiome; colorectal adenoma; colorectal  
76 cancer

## 77 78 **SUMMARY**

### 79 **What is already known about this subject?**

- 80 • Ursodeoxycholic acid (UDCA) is a therapeutic bile acid used in the treatment of primary  
81 biliary cirrhosis (PBC) and investigated for anti-cancer activity in the colon
- 82 • In humans, UDCA is produced in the colon from the conjugation of primary bile acids by  
83 intestinal bacteria

- 84 • Intestinal bacteria play a critical role in human intestinal health and disease including a  
85 hypothesized role in the development of colorectal cancer.
- 86 • UDCA was found to reduce the risk of more advanced colorectal adenoma with effects  
87 present in men but not women.
- 88 • Therapeutic UDCA was recently shown to reduce the extent of bacterial dysbiosis in  
89 patients with PBC

90

91 **What are the new findings?**

- 92 • Among a population of patients with colorectal adenoma, low dose oral UDCA taken  
93 daily produced modest changes in fecal bacterial composition
- 94 • UDCA associated changes in the gut microbiome were similar in men and women.
- 95 • UDCA associated changes in the gut microbiome were not associated with risk of any or  
96 advanced colorectal adenoma in the patient population.

97

98 **How might it impact on clinical practice in the foreseeable future?**

- 99 • These findings confirm effects of oral UDCA on the microbiome that may be beneficial  
100 for patients with PBC.
- 101 • These findings suggest that the anti-cancer effects of UDCA for colorectal adenoma  
102 prevention are not due to major effects of UDCA on the gut microbiome.

103

## 104 INTRODUCTION

105 Western diet and lifestyle account for up to 80% of colorectal cancer (CRC) incidence.<sup>1</sup>  
106 Numerous specific factors are proposed to explain this association, and their influence on the  
107 gut microbiome as a factor in CRC risk is a longstanding hypothesis.<sup>2</sup> The interplay between gut  
108 bacterial composition and host epithelium is recognized in local immune function, metabolism,  
109 and host health, including an hypothesized role in susceptibility to gastrointestinal and other  
110 cancers.<sup>3, 4</sup> Reported differences in the gut microbiome, including microbial community  
111 composition, between healthy and tumor tissues support disturbances in intestinal bacteria  
112 associated with CRC.<sup>5</sup> This includes evidence of dense colonies of bacteria (i.e., biofilms)  
113 invading the mucus layer in association with colonic adenoma and cancers, particularly of the  
114 right colon, that *in vitro* exhibit tumor-promoting effects.<sup>6</sup>

115 Establishing a causal relationship between gut bacteria and colonic neoplasia has been  
116 elusive. The best evidence for an etiologic role for gut bacteria in CRC has been obtained from  
117 mouse model studies.<sup>2</sup> For example, in the dextran sodium sulfate (DSS) inflammation-  
118 accelerated azoxymethane (AOM) mouse model of CRC, antibiotic treatment prior to and during  
119 AOM injection and throughout DSS treatment reduced tumor size and number.<sup>7</sup> Further, stool  
120 and bedding from tumor-bearing mice transferred to germ-free mice treated with AOM/DSS  
121 increased tumor size and number. Interestingly, treatment with combination AOM/DSS also was  
122 shown to alter microbial community composition. Together, such findings support microbiome  
123 remodeling as an important component of tumor development and progression.

124 Several hypotheses are proposed to explain a role for gut bacteria in CRC, including the  
125 tumorigenic activity of secondary bile acids [e.g., deoxycholic acid (DCA)] produced by bacterial  
126 bile salt hydrolases in the large intestine.<sup>2, 8-10</sup> Outstanding interest in a bile acid-CRC  
127 hypothesis led us to investigate ursodeoxycholic acid (UDCA): a therapeutic bile acid based on  
128 evidence of preventive activity in mouse models of colon carcinogenesis,<sup>11</sup> favorable effects of  
129 UDCA on bile acid pools including DCA-lowering activity,<sup>12</sup> reports of lower CRC risk in patients  
130 receiving UDCA for other indications<sup>13, 14</sup> and recent evidence that dysbiosis in the gut  
131 microbiome of patients with primary biliary cirrhosis (PBC) may be modified by treatment with  
132 UDCA.<sup>15</sup> In our phase III placebo-controlled, randomized trial of UDCA, we observed no effect  
133 of UDCA on adenoma overall at follow-up, but we noted reduction in adenoma with high-grade  
134 dysplasia.<sup>16</sup> Subsequently, we showed reduced risk for large and advanced adenoma in men  
135 randomized to UDCA, and evidence for increased risk among younger and obese women,

136 implicating sex as an important variable in UDCA activity.<sup>17</sup> Since completing this trial, evidence  
137 for sexual dimorphism in bile acid metabolism in mice<sup>18</sup> and bile acid effects on gut bacterial  
138 composition<sup>19</sup> have emerged, prompting us to evaluate UDCA for its effects on the microbiome  
139 and adenoma outcomes, with consideration for sex. We used archival paired stool specimens  
140 from a subset of participants in the UDCA trial to test the effect of UDCA on the microbiome and  
141 conduct exploratory analyses to relate microbiome measures to adenoma outcomes.

## 142 **MATERIALS AND METHODS**

### 143 **Study group, sample collection, study design**

144 As part of the Arizona phase III placebo-controlled trial of 8–10 mg/kg of body weight  
145 UDCA for the prevention of colorectal adenomas, stool samples were obtained from participants  
146 who consented to fecal bile acid analysis.<sup>20,21</sup> Briefly, eligible individuals had at least one  
147 colorectal adenoma with a diameter of  $\geq 3$  mm removed during a colonoscopy within six months  
148 before registration. A total of 1,285 participants were randomized to UDCA (n = 661) or placebo  
149 (n = 624), of whom 1,192 (613 UDCA and 579 placebo) completed the trial. The primary trial  
150 endpoint was colorectal adenoma, defined as the occurrence of one or more adenoma or  
151 adenocarcinoma at colonoscopy performed  $\geq 6$  months after the qualifying colonoscopy.  
152 Advanced adenomas were defined as previously described as those with adenocarcinoma,  
153 high-grade dysplasia, villous/tubulovillous histology, or a diameter  $\geq 1$  cm.<sup>17</sup> All stools passed  
154 over a 72-hour period were collected in a single metal container on ice. Pooled 72-hour  
155 samples were transported at 4°C to the laboratory where fecal solid was separated from fecal  
156 water as previously described.<sup>20,21</sup> Separated fecal water and solid stool were stored at  $-80^{\circ}\text{C}$   
157 for an average of 15 years until processing for microbial DNA.

158

159 For the current study, only participants with paired baseline (pre-intervention with UDCA  
160 or placebo) and end-of-study microbiome sequence data and adenoma outcome data were  
161 included. A total of 401 participants (198 UDCA and 203 placebo) with paired samples  
162 generated 802 total samples for analysis.

### 163 **DNA Extraction**

164 DNA was extracted from thawed stool samples using the QIAamp DNA Stool Mini Kit protocol  
165 (Qiagen Inc., Valencia, CA) according to the manufacturer's instructions without modifications.

166 Briefly, 200 mg of feces was placed in a sterile, round-bottom 2 mL tube containing 1.4 mL ASL  
167 lysis buffer. The homogenate was pelleted and incubated with InhibitEX to adsorb inhibitors.  
168 Proteinase K and Buffer AL were added to the supernatant to digest proteins. The DNA was  
169 bound to a spin column filter, and impurities were washed from the sample using 96–100%  
170 ethanol and proprietary Buffer AW2. All samples were eluted in 200  $\mu$ L AE buffer and stored at  
171  $-80^{\circ}\text{C}$  until use in PCR.

## 172 **PCR and Sequencing**

173 PCR of the V4 region of the 16S rRNA gene and sequencing were performed on the Illumina  
174 MiSeq platform following the original Earth Microbiome Project protocols  
175 (<http://www.earthmicrobiome.org/protocols-and-standards/>) originally described by Caporaso et  
176 al.<sup>22</sup>

## 177 **Bioinformatics**

178 Microbiome bioinformatics were performed with QIIME<sup>23</sup> 2 (<https://qiime2.org/>) 2017.4, a plugin-  
179 based system that, in some cases, wraps other microbiome analysis methods. Briefly, raw  
180 sequence data were demultiplexed and quality filtered using the q2-demux plugin followed by  
181 denoising with DADA2<sup>24</sup> (via q2-dada2) to identify all observed amplicon sequence variants  
182 (ASVs)<sup>25</sup> [i.e., 100% operational taxonomic units (OTUs)]. All ASVs were aligned with mafft<sup>26</sup>  
183 (via q2-alignment) and used to construct a phylogeny with fasttree2<sup>27</sup> (via q2-phylogeny). Alpha-  
184 diversity metrics (observed OTUs and Faith's Phylogenetic Diversity<sup>28</sup> – measures of  
185 microbiome richness) and beta-diversity metrics (weighted UniFrac<sup>29</sup>, unweighted UniFrac<sup>30</sup>,  
186 Jaccard distance, and Bray-Curtis dissimilarity – measures of microbiome composition  
187 dissimilarity) and principal coordinate analysis (PCoA) were estimated using q2-diversity after  
188 samples were rarefied (i.e., subsampled without replacement) to 900 sequences per sample.  
189 Taxonomy was assigned to ASVs using classify-sklearn (via q2-feature-classifier) against the  
190 Greengenes 13\_8 99% OTUs reference sequences<sup>31</sup>. This classifier was recently shown to  
191 achieve similar precision and recall to the RDP classifier<sup>32</sup> at the genus level on 15 mock  
192 community data sets.<sup>33</sup>

193

## 194 **Statistics**

195 Differences in baseline characteristics between the subsample and the parent trial, or between  
196 treatment arms, were tested using chi-square tests for categorical variables and *t*-tests or

197 Wilcoxon rank-sum tests for continuous variables. The difference between the freezer storage  
198 time in each treatment arm was tested using a linear mixed effects model, to account for the  
199 correlation induced by the baseline and end-of-study samples from the same subject. The  
200 association between freezer storage time and microbiome composition was tested using a  
201 Spearman correlation coefficient for baseline and end-of-study samples separately. To test for  
202 differences in microbiome composition, we performed Principle Coordinate Analysis (PCoA)  
203 based on four distance metrics (weighted UniFrac, unweighted UniFrac, Bray-Curtis, and  
204 Jaccard). Components of variance was used to estimate the between-patient versus within-  
205 patient intraclass correlation coefficient for each microbiome measure. We then computed the  
206 change (in direction and magnitude) in the first principal coordinate axis (PC1) for each subject  
207 between their pre-treatment and post-treatment samples. The average change in PC1 for each  
208 treatment group, overall and stratified by sex, was tested for difference from zero using a one-  
209 sample *t*-test with Benjamini-Hochberg false discovery rate (FDR) correction.<sup>34</sup> We additionally  
210 applied pairwise tests to determine if UDCA treatment was associated with changes in gut  
211 microbial community richness (i.e., changes in the number of bacterial taxa present in the  
212 community). This was performed by comparing change in Observed OTUs and Faith's  
213 Phylogenetic Diversity on a per subject basis in the two treatment groups.

214 We performed ANCOM<sup>35</sup> and Wilcoxon signed-rank tests comparing species abundance  
215 at baseline and end-of-study in both UDCA-treated and placebo groups. ANCOM tests were  
216 performed to assess differences within the whole bacterial community in each arm separately.  
217 Wilcoxon signed-rank tests were additionally performed on 18 individual bacterial genera, the  
218 order *Bifidobacteriales*, and the ratio of the *Firmicutes* to *Bacteroidetes* phyla abundances, all of  
219 which have been previously associated with CRC or its risk factors.

220 Associations between change in each microbiome measure and adenoma outcome (any  
221 adenoma or advanced adenoma) were tested in each arm separately using Poisson regression,  
222 adjusted for sex, age, aspirin use, baseline microbiome measure, and an indicator for whether a  
223 participant's paired baseline and end-of-study DNA samples were processed in different  
224 batches. Potential interactions between microbiome measures and UDCA on recurrence were  
225 tested using likelihood ratio tests. These statistical tests were performed with Stata 14.2  
226 (StataCorp, College Station, TX).



## 227 RESULTS

### 228 Participant characteristics

229 Characteristics of the 401-participant subgroup with complete sequence data and adenoma  
230 outcome status were compared to participants in the parent trial not included in the microbiome  
231 study, by treatment assignment (**Table 1**). The placebo subsample had fewer aspirin users (chi-  
232 square test,  $P = 0.004$ ), the largest adenomas (Wilcoxon rank-sum test,  $P = 0.040$ ), and greater  
233 adenoma number at baseline (Wilcoxon rank-sum test,  $P = 0.004$ ) than the placebo parent  
234 study. Compared to the parent trial, the UDCA subsample included more male participants (chi-  
235 square test,  $P = 0.016$ ). Within the subsample, the UDCA arm included more males (chi-square  
236 test,  $P = 0.024$ ) and more aspirin users (chi-square test,  $P = 0.003$ ) than the placebo arm.

237

### 238 Microbiome composition is not correlated with storage time

239 After separation from fecal water, solid stool samples used in this study were stored at  $-80^{\circ}\text{C}$  for  
240 varying lengths of time before microbiome sequencing. Baseline samples were stored for an  
241 average of  $17.2 \pm 1.1$  years, and end-of-study samples were stored for an average of  $14.6 \pm 1.1$   
242 years. There was no significant difference in storage time by treatment arm ( $P = 0.22$ ).  
243 Furthermore, no significant correlations were observed between storage time and any of the  
244 diversity metrics at baseline or end-of-study. Lack of evidence for storage time effects on these  
245 measures is in agreement with published studies supporting long-term freezing as an effective  
246 preservation method for studies of microbiome composition.<sup>36</sup>

### 247 Microbiome changes in response to UDCA treatment

248 PCoA based on unweighted UniFrac distance between samples does not illustrate a clear  
249 difference between baseline and end-of-study microbial communities in either treatment group  
250 (**Figure 1A**). Distances between paired samples from the same subject were smaller than  
251 distances between samples from different subjects in both treatment groups (**Figure 1B**).  
252 Intraclass correlation coefficients estimated separately for each of the four beta-diversity metrics  
253 ranged from 0.50 to 0.68 for the placebo group, and from 0.39 to 0.73 for the UDCA group  
254 (**Figure 1B**). There was no clear pattern of change in composition between the UDCA and  
255 placebo arms in terms of the magnitude of the four measures applied to assess microbial  
256 community composition ( $U = 19292.00$ ,  $P = 0.244$ ) (**Figure 1C**), suggesting that both treatment  
257 groups experience a similar amount of microbiome change between baseline and end-of-study.

258           Given the amount of microbiome changes from baseline to end-of-study appeared  
259 similar between placebo and intervention, we next tested whether individuals in either arm  
260 experienced changes in their microbiome that were more similar to one another. Paired one-  
261 sample t-tests were used to identify consistent changes across individuals in four microbial  
262 community distance metrics (**Figure 2A-D**) and two microbial community richness metrics  
263 (**Figure 2E-F**). In this analysis, UDCA treatment was associated with a shift in microbial  
264 community distance metrics according to PC1 of unweighted UniFrac ( $t = -4.393$ ,  $P < 0.001$ )  
265 distance, and PC1 of both unweighted (Jaccard:  $t = -5.697$ ,  $P < 0.001$ ) and weighted (Bray-  
266 Curtis;  $t = -2.699$ ,  $P = 0.035$ ) non-phylogenetic metrics. These shifts were not observed in the  
267 placebo arm. These results suggest that while gut microbial communities changed by a similar  
268 degree in both UDCA and placebo groups (**Figure 1C**), individuals in the UDCA arm  
269 experienced changes that were more similar to each other (i.e. 'UDCA-associated') than those  
270 in the placebo arm (**Figure 2B-D**). For gut microbial community richness (i.e., changes in the  
271 number of bacterial taxa present in the community), Observed OTUs and Faith's Phylogenetic  
272 Diversity were computed on a per-subject basis in each arm (**Figure 2 E-F**). The average  
273 change was not significantly different from zero in either arm for either measure (all  $P > 0.05$ ).  
274 Therefore, despite UDCA-induced changes in overall community composition, we found no  
275 evidence that UDCA treatment significantly altered gut microbial community richness. In other  
276 words, the significant compositional changes observed with UDCA treatment support alterations  
277 to relative abundance and even presence/absence of microbial species, but not the number of  
278 different types of organisms present in the gut microbiome.

279           Because UDCA treatment was shown to be protective against the development of  
280 adenoma in males but not females in the parent trial,<sup>17</sup> we next explored results stratified by sex  
281 (**Figure 3A-F**). Using a pairwise approach, two of the six microbiome measures showed a  
282 statistically significant change with UDCA treatment in males [unweighted UniFrac ( $t = -4.393$ ,  $P$   
283  $< 0.001$ ) and Jaccard ( $t = -5.234$ ,  $P < 0.001$ )]. For females, none of the metrics showed a  
284 significant change with UDCA, likely due to the smaller sample size (48 women versus 150  
285 men), as the mean change in PC1 was the same for females and males. As in the total sample,  
286 no systematic changes were observed for males or females in the placebo arm.

287           With the observed changes in community composition in response to UDCA treatment,  
288 we were interested in identifying bacterial taxa that exhibited abundance changes. ANCOM  
289 tests indicated that no bacterial genera or ASVs consistently differed between baseline and end-  
290 of-study measurements in the placebo group. In the UDCA treatment arm, ANCOM tests on all  
291 ASVs showed that the relative abundance of *Faecalibacterium* decreased between baseline and

292 end-of-study. Paired Wilcoxon signed-rank tests were additionally performed on 18 individual  
293 bacterial taxa that contain species or strains previously associated with CRC,<sup>37</sup> as well as for  
294 the genus *Bifidobacterium* (see **Supplemental Table 1**). Of these, *Streptococcus* (FDR-  
295 corrected P = 0.003), *Escherichia* (FDR-corrected P = 0.003), and *Bilophila* (FDR-corrected P =  
296 0.012) were found to have increased significantly, while *Fusobacterium* (FDR-corrected P =  
297 0.049) decreased in relative abundance between baseline and end-of-study in UDCA-treated  
298 subjects. There were no significant changes for these genera in the placebo arm (all FDR-  
299 corrected P > 0.05). We additionally tested whether the ratio of the Firmicutes to Bacteroidetes  
300 phylum abundances changed with treatment using Wilcoxon signed-rank tests, but did not find  
301 evidence for this in either treatment group (UDCA: W=10369.5, FDR-corrected P = 0.57;  
302 placebo: W=9081.0, FDR-corrected P = 0.13).

303

#### 304 **Change in microbiome and adenoma recurrence.**

305 We next assessed whether UDCA-associated changes in community composition, when  
306 controlled for the baseline value, were associated with adenoma development. We found no  
307 evidence that change in any of the four microbial community distance metrics from baseline to  
308 end-of-study were associated with risk of adenoma in either treatment arm (all P > 0.05) even  
309 after considering effects by sex separately. For the specific ASVs that were shown to increase  
310 with UDCA treatment (i.e., *Streptococcus*, *Escherichia*, *Bilophila* and *Fusobacterium*), we found  
311 no evidence of association between any of these ASVs and adenoma outcome in either the  
312 placebo or UDCA arm (all P > 0.05).

313

#### 314 **DISCUSSION**

315 Utilizing six metrics of microbiome diversity and richness, we assessed whether daily  
316 oral UDCA (6-8 kg/m<sup>2</sup>) given for an average of 3 years for the prevention of colorectal adenoma  
317 significantly changed the gut microbiome. Secondly, we investigated whether change in these  
318 microbiome measures were associated with adenoma risk by treatment arm considering sex as  
319 a modifying factor of UDCA chemoprevention benefit. Our results show participants randomized  
320 to UDCA exhibited non-random changes in their microbiome diversity. However, the UDCA  
321 associated changes were not associated with any chemopreventive action of UDCA for  
322 adenoma risk. We observed no significant effect of UDCA on species richness (number of  
323 observed ASVs, a corollary of the number of species present) or phylogenetic richness of  
324 microbial communities nor UDCA-related changes in abundance-weighted UniFrac phylogenetic  
325 diversity metrics (which is biased toward detecting changes in distantly related community  
326 members that are present in high relative abundance, discussed below). Further, while the

327 observed effects on the microbiome reached significance in the larger sample size of men, the  
328 overall pattern of change was similar for women. Our results do not support UDCA effects on  
329 the microbiome as a mediator of chemopreventive activity nor do we find evidence of differential  
330 effects of UDCA on the gut microbiome by sex as an explanation for our previous finding of  
331 chemopreventive effects of UDCA for adenoma in men but not women.

332 Microbial communities in participants randomized to UDCA differed in their composition,  
333 particularly in PC1, as measured by unweighted but not weighted UniFrac. Unweighted UniFrac  
334 is a measure of the degree of phylogenetic similarity between two microbial communities not  
335 considering abundance of ASVs, and, hence, is equally sensitive to differences in low- and high-  
336 abundance ASVs. In contrast, weighted UniFrac accounts for ASV abundances when  
337 comparing microbial community composition between samples and is therefore more sensitive  
338 to detecting changes in high-abundance ASVs. Both UniFrac metrics are designed to up-weight  
339 changes in phylogenetically dissimilar ASVs relative to phylogenetically similar ASVs. Thus, our  
340 observation of a significant change in unweighted UniFrac and no significant change in  
341 weighted UniFrac suggests that overall distantly related, but lower abundance, ASVs changed  
342 with UDCA.

343 Bray-Curtis (abundance-weighted) and Jaccard dissimilarity measures are the non-  
344 phylogenetic analogs to weighted and unweighted UniFrac, respectively; they measure the  
345 degree to which two microbial communities share ASVs, rather than the degree of phylogenetic  
346 relatedness between communities. We observed a significant change in Bray-Curtis distance.  
347 Together with no significant change in weighted UniFrac, our results suggest that high  
348 abundant, phylogenetically similar ASVs are changing with UDCA. As Jaccard distance is not  
349 phylogenetically or abundance weighted, it limits interpretation of the results and implies only  
350 that some ASVs are changing. By comparing our results across these four metrics, we can gain  
351 some insight into categories of microbial community members that are changing in response to  
352 UDCA. Specifically, our results suggest that distantly related, low-abundance ASVs as well as  
353 closely related, high-abundance ASVs (but not distantly related, high-abundance ASVs) are  
354 changed with UDCA treatment.

355 To gain insight on how the observed UDCA changes related to changes in the  
356 taxonomic composition of the gut microbiome, we evaluated the bacterial phyla and genera  
357 most strongly associated with PC1. This was achieved by computing Spearman correlation  
358 coefficients between the phyla and genera that were observed at least one time in at least 50%  
359 of the 802 pre- and post-treatment microbiome samples. For most metrics, change in PC1 was  
360 associated with an increase in the Bacteroidetes relative abundance and a decrease in the

361 Firmicutes relative abundance with UDCA treatment. The Bacteroidetes and Firmicutes are two  
362 dominant microbial phyla comprising the gut microbiome. These common bacteria in the human  
363 gut and their ratio to each other have been suggested to reflect dietary pattern and overall  
364 balance of the gut microbiome. For example, a high Firmicutes to Bacteroidetes ratio has been  
365 associated with consumption of the Western diet<sup>17</sup> and with adverse metabolic changes that  
366 occur with obesity.<sup>38, 39</sup> In contrast, a low Firmicutes to Bacteroidetes ratio has been associated  
367 with reduced gut biodiversity<sup>40</sup> and observed in patients with inflammatory bowel disease.<sup>41</sup>  
368 While the relative abundance of all Firmicutes and Bacteroidetes did not change in either  
369 treatment group, individual Firmicutes taxa tended to decrease while Bacteroidetes taxa  
370 increased and were associated with changes along the PC1 axis. As such, the decreases in  
371 Firmicutes and increases in Bacteroidetes with UDCA may reflect positive effects of UDCA on  
372 the gut microbiome.

373 UDCA-associated increases in species of *Streptococcus*, *Escherichia*, and *Bilophila* and  
374 decreases in *Fusobacterium* are notable in context of reported associations between different  
375 members of these genera and CRC. An increase in *Bilophila* is biologically consistent with  
376 earlier studies, including our own, showing that UDCA led to increases in the levels of DCA in  
377 aqueous and solid stool fractions, with evidence that UDCA may enhance fecal bile acid levels  
378 through inhibitory effects on 7- $\alpha$ -dehydroxylation of cholic acid. As such, expansion of *Bilophila*  
379 would be expected but perhaps not desirable given pro-inflammatory effects of *Bilophila*  
380 *wadsworthia* in mice. Increases in members of the genera *Streptococcus* and *Escherichia* with  
381 UDCA may similarly reflect response to changes in the bile acid pool in stools of UDCA  
382 subjects. At the 16S RNA level we are unable to assess effects on select strains of bacteria. For  
383 example, we are unable to determine the effects of UDCA on streptococcal lactic acid bacteria  
384 thought to have anti-mutagenic/anti-cancer properties in human intestine,<sup>42</sup> from subspecies of  
385 *Streptococcus gallolyticus* that have been associated with colon cancer proliferation and  
386 growth.<sup>43</sup> Importantly, we are unable to test for any UDCA effect on *E. coli* strains harboring the  
387 polyketide synthase (*pks*) genomic island, which encodes for the genotoxin colibactin, and has  
388 been identified in cancer and inflammatory bowel disease and shown to promote tumor  
389 development in inflammatory mouse models.<sup>44, 45</sup> Interesting is the observed UDCA reduction in  
390 *Fusobacterium spp.* Several studies have suggested a link between *Fusobacterium spp.* and  
391 CRC with interest in *F. nucleatum*. Most recently, this association has been suggested to reflect  
392 a 'passenger' role where *F. nucleatum* expands in numbers in response to an environment that  
393 favors CRC as opposed to a direct causal role<sup>46</sup> explaining the failure of *F. nucleatum* strains  
394 identified in patients to promote colonic tumors in mouse models. Whether UDCA-associated

395 decreases in *Fusobacterium spp.* include a change in *F. nucleatum* warrants more-selective  
396 sequence analysis.

397 Longitudinal variation of the gut microbial community within individuals is expected<sup>47</sup> and  
398 the degree of variation fluctuates between individuals.<sup>48, 49</sup> This variation, along with the high  
399 intraclass correlation coefficients observed in our study and evidence that components of the  
400 microbiome are highly individualized,<sup>50</sup> are significant limiting factors for the detectability of  
401 modest effects of medical treatment on the microbiome in all but extreme cases such as  
402 vancomycin treatment or fecal microbiota transplant. As such, despite being one of the largest  
403 studies of drug effects on the microbiome in the randomized setting, we are unable to rule out  
404 modest effects of UDCA on the microbiome as a mechanism of drug effect on colorectal  
405 adenoma development.

406

407

#### 408 **FIGURE LEGENDS**

409

410 Figure 1: A) PCoA plots for UDCA and placebo groups with pre and post samples (light and  
411 dark, respectively). B) Violin plots illustrate the full distribution of data for different values of  
412 unweighted UniFrac distances within and between individuals. Marker for the median (center  
413 point), interquartile range (box), and 1.5 interquartile range (whiskers) are included. Distances  
414 within individuals are significantly less than distances between individuals. C) Violin plots depict  
415 the magnitude of change in microbiome composition between baseline and end-of-study in  
416 UDCA and placebo groups. The magnitude of change did not differ significantly between the  
417 treatment groups for any of these metrics.

418

419 Figure 2: Pairwise changes in PC1 between baseline and end-of-study samples (left panels)  
420 and correlation with taxonomic changes (right panels) shown for phyla (dark gray bars) and  
421 genera (light gray bars). Question marks indicate unknown genera and include the most specific  
422 known taxonomic association in parentheses. A-D) Change in PC1 for microbial community  
423 distance metrics in each treatment arm. E-F) Change in microbial community richness metrics in  
424 each treatment arm. Statistically significant comparisons are indicated with an asterisk and p-  
425 value.

426

427 Figure 3: Pairwise changes between baseline and end-of-study samples stratified by treatment  
428 arm and sex. A-D) Change in PC1 for microbial community distance metrics. E-F) Change in



429 microbial community richness metrics. Statistically significant comparisons between treatment  
430 arms are indicated with an asterisk and p-values.

431

432 Table 1. Baseline characteristics of participants in the subsample compared to the parent trial,  
433 by treatment arm.

434

435 Supplemental Table 1. Wilcoxon signed-rank test comparison comparing relative abundance of  
436 carcinogenesis-associated taxa pre- and post-treatment in UDCA-treated subjects

437

438 Table 1. Baseline characteristics of participants in the subsample compared to the parent trial,  
439 by treatment arm.

| Variable                                   | Placebo arm                    |                                   | UDCA arm                       |                                   |
|--------------------------------------------|--------------------------------|-----------------------------------|--------------------------------|-----------------------------------|
|                                            | Subsample<br>( <i>n</i> = 203) | Parent trial<br>( <i>n</i> = 421) | Subsample<br>( <i>n</i> = 198) | Parent trial<br>( <i>n</i> = 463) |
| Age, mean ± SD                             | 66.5 ± 8.0                     | 66.3 ± 8.5                        | 66.2 ± 8.9                     | 66.0 ± 8.6                        |
| Male, <i>n</i> (%)                         | 133 (65.5)                     | 280 (66.5)                        | 150 (75.8)                     | 307 (66.3)                        |
| White, <i>n</i> (%)                        | 188 (94.0)                     | 388 (93.7)                        | 189 (96.9)                     | 426 (94.3)                        |
| Education (y), mean ± SD                   | 13.9 ± 2.3                     | 14.1 ± 2.3                        | 14.1 ± 2.3                     | 13.9 ± 2.2                        |
| Ever smoker, <i>n</i> (%)                  | 134 (69.1)                     | 293 (71.6)                        | 125 (64.1)                     | 314 (69.8)                        |
| Current smoker, <i>n</i> (%)               | 21 (10.3)                      | 57 (13.5)                         | 23 (11.6)                      | 56 (12.1)                         |
| BMI (kg/m <sup>2</sup> ), mean ± SD        | 28.4 ± 4.7                     | 28.1 ± 4.8                        | 28.0 ± 4.9                     | 28.1 ± 4.8                        |
| Aspirin use, <i>n</i> (%)                  | 39 (19.2)                      | 127 (30.2)                        | 64 (32.3)                      | 124 (26.8)                        |
| Family history of CRC, <i>n</i> (%)        | 66 (32.5)                      | 115 (27.3)                        | 57 (28.8)                      | 111 (24.0)                        |
| Previous polyp, <i>n</i> (%)               | 77 (40.1)                      | 189 (48.6)                        | 94 (48.7)                      | 209 (48.1)                        |
| Largest adenoma (mm), mean ± SD; median    | 9.6 ± 6.3; 8                   | 8.4 ± 5.4; 7.5                    | 8.9 ± 5.4; 8                   | 8.7 ± 5.4; 8                      |
| Number of adenomas, mean ± SD; median      | 1.6 ± 0.9; 1                   | 1.5 ± 0.8; 1                      | 1.7 ± 1.1; 1                   | 1.6 ± 0.9; 1                      |
| Proximal adenomas, <i>n</i> (%)            | 113 (55.7)                     | 227 (54.2)                        | 112 (56.6)                     | 260 (56.3)                        |
| Villous component to adenoma, <i>n</i> (%) | 46 (22.7)                      | 78 (18.5)                         | 33 (16.7)                      | 106 (23.0)                        |
| High-grade dysplasia, <i>n</i> (%)         | 21 (10.3)                      | 35 (8.3)                          | 19 (9.6)                       | 38 (8.2)                          |

440

441

442

443

444 Missing data: race, *n* = 24 (1.9%); education, *n* = 29 (2.3%); ever smoker, *n* = 37 (2.9%); BMI, *n*  
445 = 29 (2.3%); previous polyp, *n* = 76 (5.9%); largest adenoma, *n* = 1 (0.1%); proximal adenoma,  
446 *n* = 3 (0.2%); villous histology, *n* = 2 (0.2%)

447

448

449

450

451

452

453

454

455

456

457



458 **CITATIONS**

459

- 460 1. Vargas AJ, Thompson PA. Diet and nutrient factors in colorectal cancer risk. *Nutr Clin*  
461 *Pract* 2012;27:613-23.
- 462 2. Louis P, Hold GL, Flint HJ. The gut microbiota, bacterial metabolites and colorectal  
463 cancer. *Nat Rev Micro* 2014;12:661-672.
- 464 3. Ullman TA, Itzkowitz SH. Intestinal inflammation and cancer. *Gastroenterology*  
465 2011;140:1807-16.
- 466 4. Drewes JL, Housseau F, Sears CL. Sporadic colorectal cancer: microbial contributors to  
467 disease prevention, development and therapy. *Br J Cancer* 2016;115:273-280.
- 468 5. Dulal S, Keku TO. Gut microbiome and colorectal adenomas. *Cancer J* 2014;20:225-31.
- 469 6. Dejea CM, Wick EC, Hechenbleikner EM, et al. Microbiota organization is a distinct  
470 feature of proximal colorectal cancers. *Proceedings of the National Academy of*  
471 *Sciences* 2014;111:18321-18326.
- 472 7. Zackular JP, Baxter NT, Iverson KD, et al. The gut microbiome modulates colon  
473 tumorigenesis. *MBio* 2013;4:e00692-13.
- 474 8. Reddy BS, Wynder EL. Metabolic epidemiology of colon cancer. Fecal bile acids and  
475 neutral sterols in colon cancer patients and patients with adenomatous polyps. *Cancer*  
476 1977;39:2533-9.
- 477 9. Bayerdorffer E, Mannes GA, Richter WO, et al. Increased serum deoxycholic acid levels  
478 in men with colorectal adenomas. *Gastroenterology* 1993;104:145-51.
- 479 10. Degirolamo C, Modica S, Palasciano G, et al. Bile acids and colon cancer: Solving the  
480 puzzle with nuclear receptors. *Trends in Molecular Medicine* 2011;17:564-572.
- 481 11. Earnest DL, Holubec H, Wali RK, et al. Chemoprevention of azoxymethane-induced  
482 colonic carcinogenesis by supplemental dietary ursodeoxycholic acid. *Cancer Res*  
483 1994;54:5071-4.
- 484 12. Batta AK, Salen G, Holubec H, et al. Enrichment of the More Hydrophilic Bile Acid  
485 Ursodeoxycholic Acid in the Fecal Water-soluble Fraction after Feeding to Rats with  
486 Colon Polyps. *Cancer Research* 1998;58:1684-1687.
- 487 13. Tung BY, Emond MJ, Haggitt RC, et al. Ursodiol use is associated with lower prevalence  
488 of colonic neoplasia in patients with ulcerative colitis and primary sclerosing cholangitis.  
489 *Ann Intern Med* 2001;134:89-95.
- 490 14. Serfaty L, De Leusse A, Rosmorduc O, et al. Ursodeoxycholic acid therapy and the risk  
491 of colorectal adenoma in patients with primary biliary cirrhosis: an observational study.  
492 *Hepatology* 2003;38:203-9.
- 493 15. Tang R, Wei Y, Li Y, et al. Gut microbial profile is altered in primary biliary cholangitis  
494 and partially restored after UDCA therapy. *Gut* 2017.
- 495 16. Alberts D, Martinez M, Hess L, et al. Phase III trial of ursodeoxycholic acid to prevent  
496 colorectal adenoma recurrence. *J Natl Cancer Inst* 2005;97:846-853.
- 497 17. Thompson PA, Wertheim BC, Roe DJ, et al. Gender modifies the effect of  
498 ursodeoxycholic acid in a randomized controlled trial in colorectal adenoma patients.  
499 *Cancer Prev Res (Phila)* 2009;2:1023-30.
- 500 18. Zhang Y, Klaassen CD. Effects of feeding bile acids and a bile acid sequestrant on  
501 hepatic bile acid composition in mice. *Journal of Lipid Research* 2010;51:3230-3242.
- 502 19. Islam KBMS, Fukiya S, Hagio M, et al. Bile Acid Is a Host Factor That Regulates the  
503 Composition of the Cecal Microbiota in Rats. *Gastroenterology* 2011;141:1773-1781.
- 504 20. Alberts DS, Einspahr JG, Earnest DL, et al. Fecal bile acid concentrations in a  
505 subpopulation of the wheat bran fiber colon polyp trial. *Cancer Epidemiol Biomarkers*  
506 *Prev* 2003;12:197-200.

- 507 21. Wertheim BC, Martinez ME, Ashbeck EL, et al. Physical activity as a determinant of  
508 fecal bile acid levels. *Cancer Epidemiol Biomarkers Prev* 2009;18:1591-8.
- 509 22. Caporaso JG, Lauber CL, Walters WA, et al. Ultra-high-throughput microbial community  
510 analysis on the Illumina HiSeq and MiSeq platforms. *ISME J* 2012;6:1621-4.
- 511 23. Caporaso JG, Kuczynski J, Stombaugh J, et al. QIIME allows analysis of high-  
512 throughput community sequencing data. *Nat Methods* 2010;7:335-6.
- 513 24. Callahan BJ, McMurdie PJ, Rosen MJ, et al. DADA2: High-resolution sample inference  
514 from Illumina amplicon data. *Nat Methods* 2016;13:581-3.
- 515 25. Callahan BJ, McMurdie PJ, Holmes SP. Exact sequence variants should replace  
516 operational taxonomic units in marker-gene data analysis. *ISME J* 2017.
- 517 26. Katoh K, Misawa K, Kuma K, et al. MAFFT: a novel method for rapid multiple sequence  
518 alignment based on fast Fourier transform. *Nucleic Acids Res* 2002;30:3059-66.
- 519 27. Price MN, Dehal PS, Arkin AP. FastTree 2--approximately maximum-likelihood trees for  
520 large alignments. *PLoS One* 2010;5:e9490.
- 521 28. Faith DP. Conservation Evaluation and Phylogenetic Diversity. *Biological Conservation*  
522 1992;61:1-10.
- 523 29. Lozupone CA, Hamady M, Kelley ST, et al. Quantitative and qualitative beta diversity  
524 measures lead to different insights into factors that structure microbial communities.  
525 *Applied and Environmental Microbiology* 2007;73:1576-1585.
- 526 30. Lozupone C, Knight R. UniFrac: a new phylogenetic method for comparing microbial  
527 communities. *Appl Environ Microbiol* 2005;71:8228-35.
- 528 31. McDonald D, Price MN, Goodrich J, et al. An improved Greengenes taxonomy with  
529 explicit ranks for ecological and evolutionary analyses of bacteria and archaea. *ISME J*  
530 2012;6:610-8.
- 531 32. Wang Q, Garrity GM, Tiedje JM, et al. Naive Bayesian classifier for rapid assignment of  
532 rRNA sequences into the new bacterial taxonomy. *Appl Environ Microbiol* 2007;73:5261-  
533 7.
- 534 33. Bokulich N, Kaehler B, Rideout J, et al. Optimizing taxonomic classification of marker  
535 gene sequences. *PeerJ Preprints* 2017;5e3208v1
- 536 34. Benjamini Y, Hochberg Y. Controlling the False Discovery Rate: A Practical and  
537 Powerful Approach to Multiple Testing. *Journal of the Royal Statistical Society. Series B*  
538 (Methodological) 1995;57:289-300.
- 539 35. Mandal S, Van Treuren W, White RA, et al. Analysis of composition of microbiomes: a  
540 novel method for studying microbial composition. *Microb Ecol Health Dis* 2015;26:27663.
- 541 36. Song SJ, Amir A, Metcalf JL, et al. Preservation Methods Differ in Fecal Microbiome  
542 Stability, Affecting Suitability for Field Studies. *mSystems* 2016;1.
- 543 37. Coleman OI, Nunes T. Role of the Microbiota in Colorectal Cancer: Updates on Microbial  
544 Associations and Therapeutic Implications. *Biores Open Access* 2016;5:279-288.
- 545 38. Barlow GM, Yu A, Mathur R. Role of the Gut Microbiome in Obesity and Diabetes  
546 Mellitus. *Nutrition in Clinical Practice* 2015;30:787-797.
- 547 39. Sweeney TE, Morton JM. The human gut microbiome: A review of the effect of obesity  
548 and surgically induced weight loss. *JAMA Surgery* 2013;148:563-569.
- 549 40. Quagliariello A, Aloisio I, Bozzi Cionci N, et al. Effect of *Bifidobacterium breve* on the  
550 Intestinal Microbiota of Coeliac Children on a Gluten Free Diet: A Pilot Study. *Nutrients*  
551 2016;8:660.
- 552 41. Walker AW, Sanderson JD, Churcher C, et al. High-throughput clone library analysis of  
553 the mucosa-associated microbiota reveals dysbiosis and differences between inflamed  
554 and non-inflamed regions of the intestine in inflammatory bowel disease. *BMC*  
555 *Microbiology* 2011;11:7.
- 556 42. Wollowski I, Rechkemmer G, Pool-Zobel BL. Protective role of probiotics and prebiotics  
557 in colon cancer. *The American Journal of Clinical Nutrition* 2001;73:451s-455s.

- 558 43. Kumar R, Herold JL, Schady D, et al. *Streptococcus gallolyticus* subsp. *gallolyticus*  
559 promotes colorectal tumor development. *PLOS Pathogens* 2017;13:e1006440.  
560 44. Tomkovich S, Yang Y, Winglee K, et al. Locoregional Effects of Microbiota in a  
561 Preclinical Model of Colon Carcinogenesis. *Cancer Research* 2017;77:2620-2632.  
562 45. Arthur JC, Perez-Chanona E, Mühlbauer M, et al. Intestinal Inflammation Targets  
563 Cancer-Inducing Activity of the Microbiota. *Science* 2012;338:120-123.  
564 46. Amitay EL, Werner S, Vital M, et al. *Fusobacterium* and colorectal cancer: Causal factor  
565 or passenger? Results from a large colorectal cancer screening study. *Carcinogenesis*  
566 2017.  
567 47. Caporaso JG, Lauber CL, Costello EK, et al. Moving pictures of the human microbiome.  
568 *Genome Biol* 2011;12:R50.  
569 48. Gajer P, Brotman RM, Bai G, et al. Temporal dynamics of the human vaginal microbiota.  
570 *Sci Transl Med* 2012;4:132ra52.  
571 49. Flores GE, Caporaso JG, Henley JB, et al. Temporal variability is a personalized feature  
572 of the human microbiome. *Genome Biol* 2014;15:531.  
573 50. Falony G, Joossens M, Vieira-Silva S, et al. Population-level analysis of gut microbiome  
574 variation. *Science* 2016;352:560-4.  
575

Figure 1

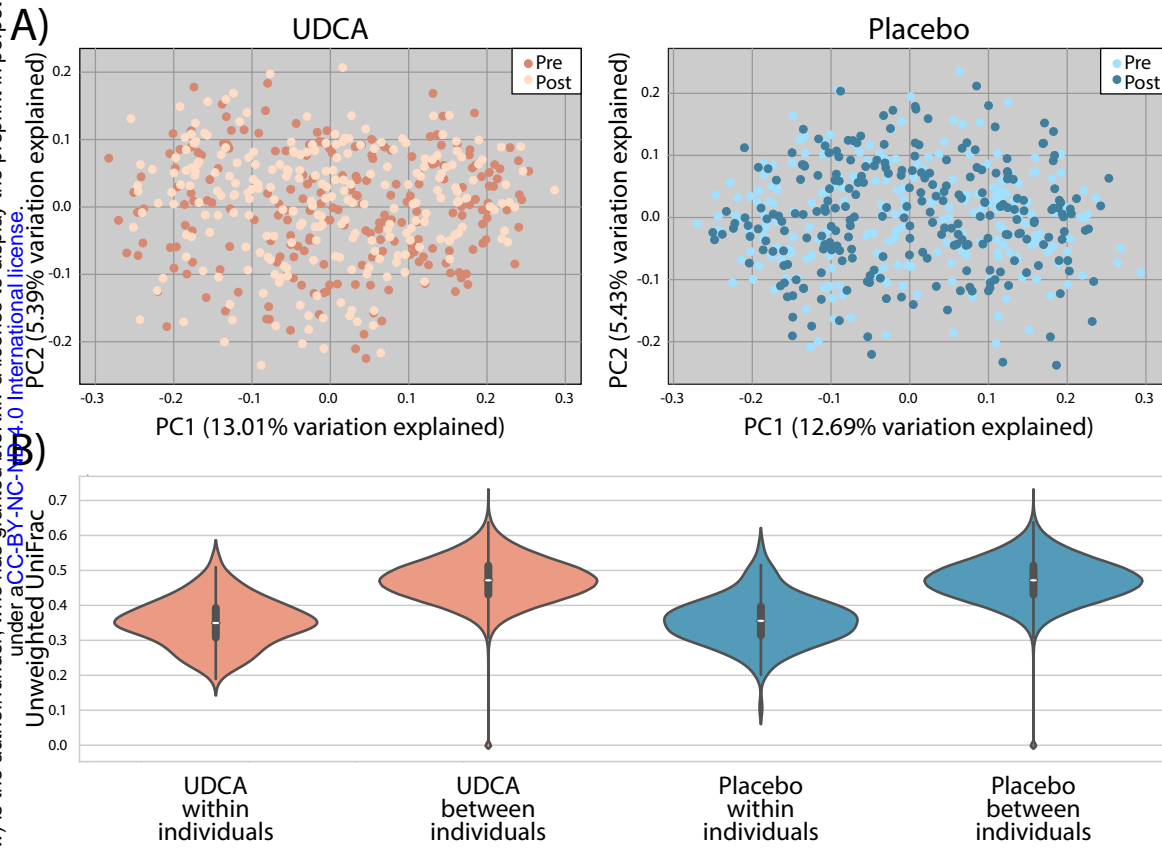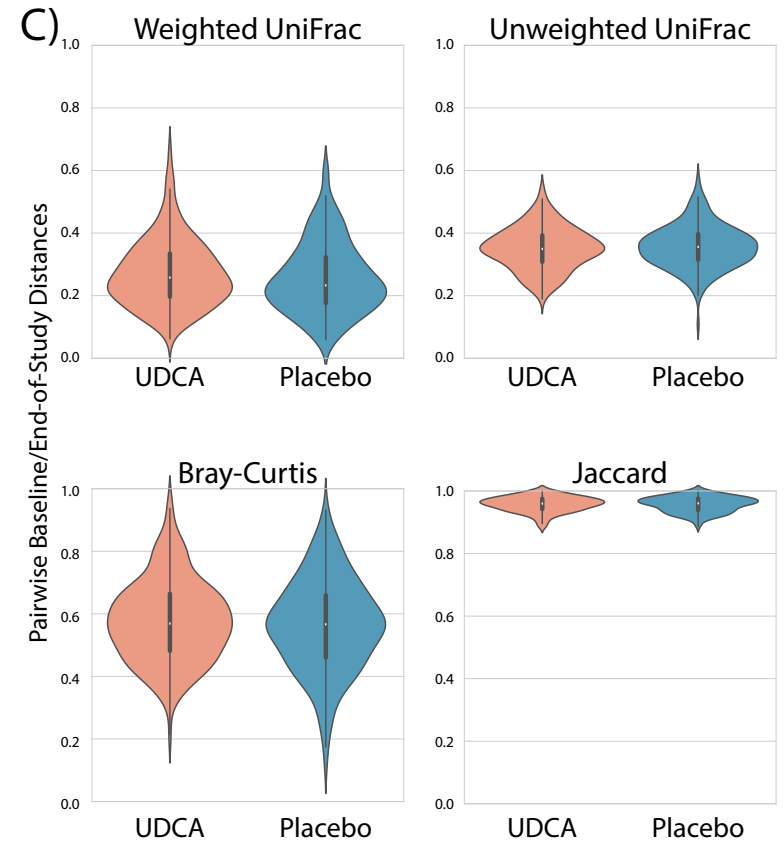

Source: https://www.biorxiv.org/content/10.1101/237495v1.full.pdf
